# Supplementary material for: Adaptive Cartesian Meshes for Atmospheric Single-Column Models,a study using Basilisk 18-02-16
Source: Copernicus journal article supplement (doi:10.5194/gmd-2018-21), 2018-03-29

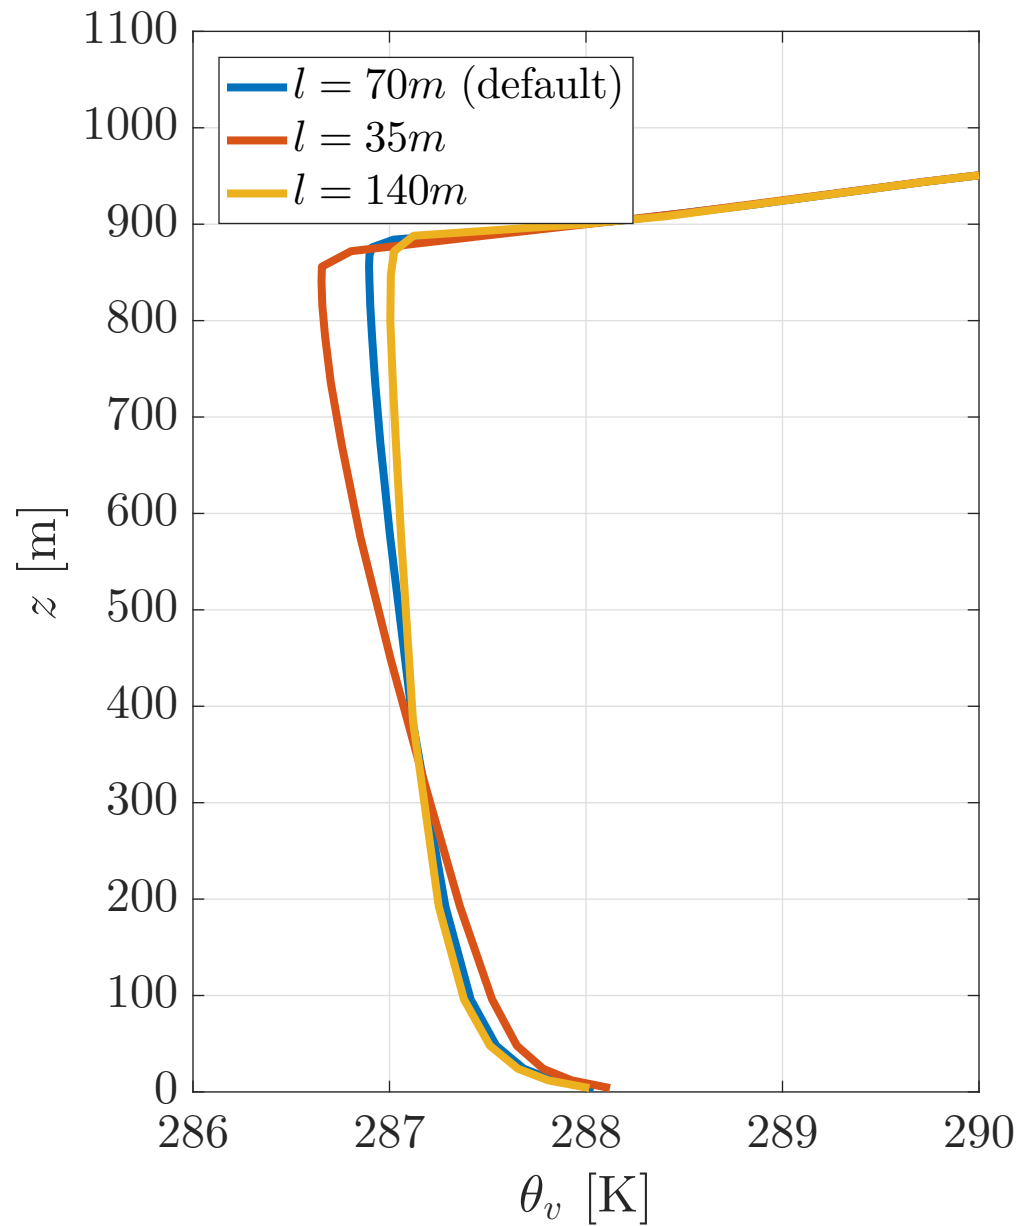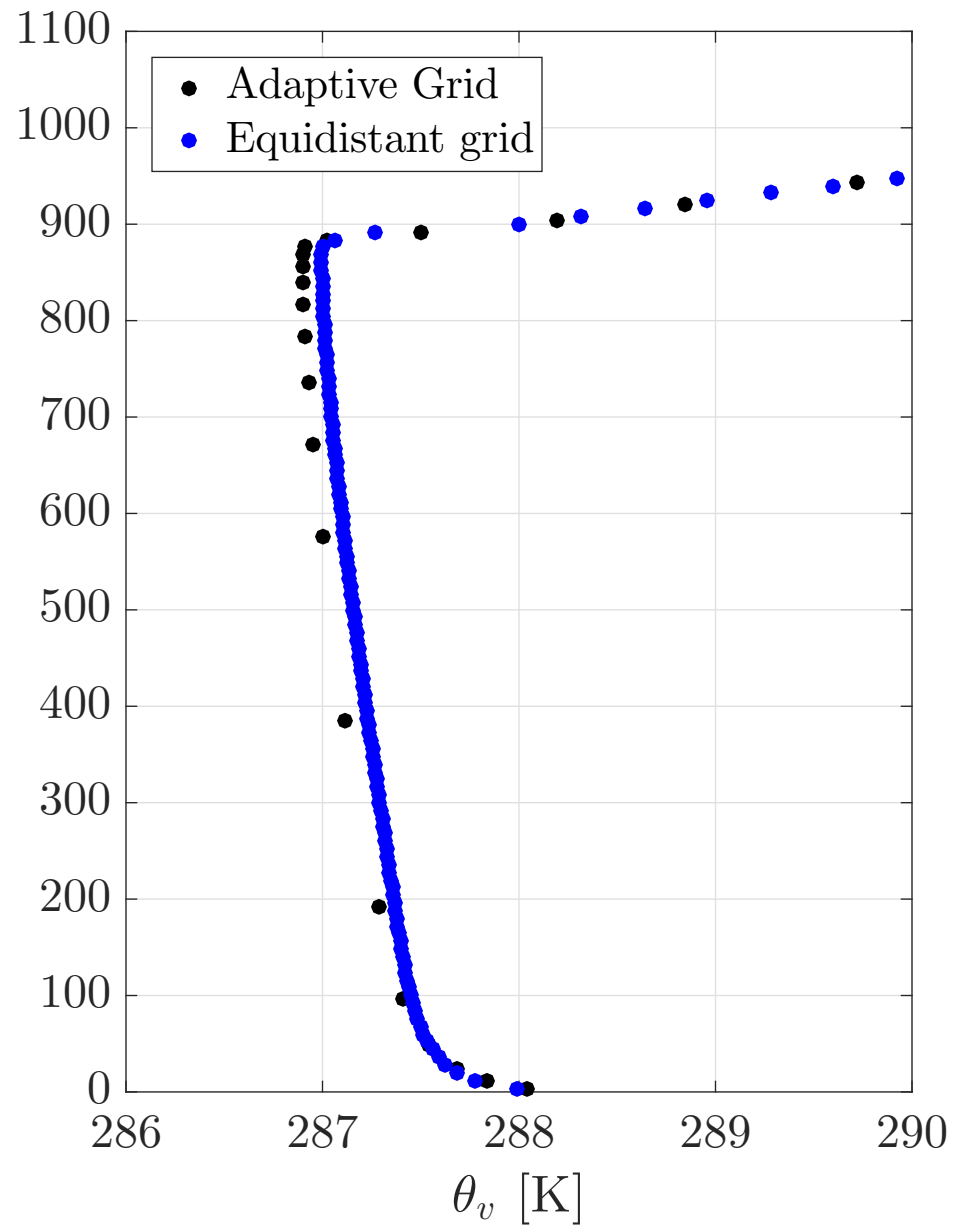

Supplement: Supplementary file [file gmd-2018-21-AC1-supplement.pdf]
